# Supplementary material for: Benzophenones and synthetic progestin in wastewater and sediment from farms, WWTPs and receiving surface water: distribution, sources, and ecological risks
Source: Royal Society of Chemistry journal article supplement (doi:10.1039/d1ra05333g), 2021-01-01
Supplement: d1ra05333g1.pdf [file d1ra05333g1.pdf]

**Table S1.** CAS number of the target substance; LogKow, Fragmentor voltage (V), Collision energies (eV), MRM transitions for the quantifier ions, LOD (ng/mL) and LOQ (ng/mL) of each substances

| Target substance                             | CAS NO.   | LogKow | Fragmentor voltage | Collision Energy | Polarity | MRM                         | LOD  | LOQ  |
|----------------------------------------------|-----------|--------|--------------------|------------------|----------|-----------------------------|------|------|
| Benzophenone-1 (BP-1)                        | 131-56-6  | 2.96   | 108                | 19/18            | Positive | 215.1 > 137<br>215.1 > 105  | 0.06 | 0.02 |
| Benzophenone-2 (BP-2)                        | 131-55-5  | 2.78   | 112                | 16/35            | Positive | 247.2 > 137<br>247.2 > 81.2 | 0.06 | 0.02 |
| Benzophenone-3 (BP-3)                        | 131-57-7  | 3.79   | 93                 | 18/18            | Positive | 229.1 > 151<br>229.1 > 105  | 0.06 | 0.02 |
| Benzophenone-4 (BP-4)                        | 4065-45-6 | 0.37   | 128                | 18/35            | Positive | 309.2 > 231<br>309.2 > 135  | 0.06 | 0.02 |
| 2, 3, 4-Trihydroxybenzophenone (2,3,4-OH-BP) | 1143-72-2 | -      | 124                | 18/28            | Negative | 227.2 > 199<br>227.2 > 101  | 0.03 | 0.1  |
| 4-Hydroxybenzophenone (4-OH-BP)              | 1137-42-4 | -      | 130                | 26/37            | Negative | 197 > 120<br>197 > 92       | 0.03 | 0.1  |
| Benzophenone (BP)                            | 119-61-9  | 3.18   | 97                 | 13/28            | Positive | 183.2 > 105<br>183.2 > 77.3 | 0.06 | 0.02 |
| BPA-d16                                      | -         | -      | 121                | 18/22            | Negative | 241.5 > 223<br>241.5 > 142  | 0.1  | 0.03 |
| Cyproterone Acetate (CPA)                    | 427-51-0  | 3.10   | 160                | 25/13            | Positive | 417 > 279<br>417 > 118.9    | 0.03 | 0.01 |

|                                |            |      |     |       |          |                              |      |       |
|--------------------------------|------------|------|-----|-------|----------|------------------------------|------|-------|
| Gestodene<br>(GES)             | 60282-87-3 | 3.26 | 130 | 5/29  | Positive | 311 > 108.9<br>311 > 149     | 0.03 | 0.01  |
| Norethindrone<br>(NTD)         | 68-22-4    | 2.97 | 125 | 21/29 | Positive | 299 > 108.9<br>299 > 119     | 0.01 | 0.004 |
| Diethylstilbestrol<br>(DES)    | 6898-97-1  | 5.42 | 120 | 25    | Negative | 267.1 > 221.8                | 0.05 | 0.006 |
| Levonorgestrel<br>(LNG)        | 797-63-7   | 3.48 | 125 | 13/20 | Positive | 312.45 > 299.4               | 0.01 | 0.004 |
| Ethinyl Estradiol<br>(EE2)     | 57-63-6    | 3.67 | 125 | 9/18  | Positive | 295.4 > 132.8<br>295.4 > 159 | 0.01 | 0.004 |
| Norethindrone-d16<br>(NTD-d16) | -          | -    | 145 | 25/45 | Positive | 306.1 > 134.1<br>306.1 > 113 | 0.01 | 0.004 |

---

**Table S2.** Detailed georeferences of the specific sampling sites.

| <b>Sample site</b> | <b>Latitude (N)</b> | <b>Longitude (E)</b> |
|--------------------|---------------------|----------------------|
| H1                 | 121.246005          | 31.393626            |
| H2                 | 121.357180          | 31.419326            |
| H3                 | 121.585154          | 31.349584            |
| H4                 | 121.534852          | 31.314612            |
| H5                 | 121.476947          | 31.279320            |
| H6                 | 121.410709          | 31.247439            |
| H7                 | 121.428896          | 31.185293            |
| H8                 | 121.401518          | 31.144931            |
| H9                 | 121.232267          | 31.046140            |
| H10                | 121.227258          | 31.013524            |
| H11                | 121.164213          | 30.898257            |
| H12                | 121.513014          | 30.928158            |
| H13                | 121.605111          | 31.031802            |
| H14                | 121.649541          | 30.917133            |
| W1                 | 121.179179          | 31.383836            |
| W2                 | 121.283524          | 31.404648            |
| W3                 | 121.405522          | 31.469368            |
| W4                 | 121.509756          | 31.405070            |
| W5                 | 121.453881          | 31.351694            |
| W6                 | 121.492209          | 31.284817            |
| W7                 | 121.391855          | 31.294117            |
| W8                 | 121.624753          | 31.348783            |
| W9                 | 121.380172          | 31.127897            |

---

|     |            |           |
|-----|------------|-----------|
| W10 | 121.273566 | 31.188779 |
| W11 | 121.120206 | 31.136156 |
| A1  | 121.363047 | 31.495153 |
| A2  | 121.284454 | 31.430041 |
| A3  | 121.216951 | 31.304633 |
| A4  | 121.106938 | 31.240942 |
| A5  | 121.156161 | 31.139963 |
| A6  | 121.371619 | 30.957829 |
| A7  | 121.392600 | 30.872183 |
| A8  | 121.648587 | 30.855820 |
| A9  | 121.708359 | 30.856941 |
| L1  | 121.283886 | 31.486037 |
| L2  | 121.066341 | 30.950691 |
| L3  | 121.387476 | 30.958154 |
| L4  | 121.201227 | 30.816296 |
| L5  | 121.842592 | 31.058703 |
| R1  | 120.972742 | 31.094031 |
| R2  | 120.850678 | 30.909603 |
| R3  | 121.241014 | 30.963861 |
| R4  | 121.351556 | 30.979153 |
| R5  | 121.424994 | 31.000236 |
| R6  | 121.487197 | 31.020511 |
| R7  | 121.469144 | 31.085361 |
| R8  | 121.455492 | 31.142136 |
| R9  | 121.485986 | 31.245114 |
| R10 | 121.537239 | 31.256878 |

---

---

|     |            |           |
|-----|------------|-----------|
| R11 | 121.551017 | 31.332717 |
| R12 | 121.494933 | 31.372344 |
| R13 | 121.508275 | 31.389822 |

---

**Table S3.** Recovery information of target compounds.

| Target compounds | % Recovery ( $\pm$ SD) | % matrix Effect <sup>a</sup> ( $\pm$ SD) | % Accuracy <sup>b</sup> |           |            |
|------------------|------------------------|------------------------------------------|-------------------------|-----------|------------|
|                  |                        |                                          | 0.5 (ng/mL)             | 5 (ng/mL) | 50 (ng/mL) |
| BP-1             | 102.32 $\pm$ 4.57      | 100.34 $\pm$ 3.65                        | 102                     | 102       | 102        |
| BP-2             | 93.45 $\pm$ 9.21       | 89.54 $\pm$ 4.27                         | 98                      | 102       | 102        |
| BP-3             | 91.41 $\pm$ 1.25       | 99.24 $\pm$ 5.31                         | 99                      | 103       | 99         |
| BP-4             | 91.23 $\pm$ 7.65       | 94.31 $\pm$ 4.67                         | 102                     | 100       | 100        |
| 2,3,4-OH-BP      | 102.34 $\pm$ 4.95      | 89.31 $\pm$ 1.35                         | 103                     | 99        | 100        |
| BP               | 98.78 $\pm$ 6.33       | 85.67 $\pm$ 2.67                         | 101                     | 100       | 103        |
| 4-OH-BP          | 83.45 $\pm$ 3.66       | 94.36 $\pm$ 6.13                         | 99                      | 97        | 97         |
| CPA              | 102.35 $\pm$ 2.87      | 101.23 $\pm$ 2.84                        | 106                     | 103       | 103        |
| GES              | 99.89 $\pm$ 4.14       | 103.54 $\pm$ 2.13                        | 101                     | 105       | 105        |
| NTD              | 87.94 $\pm$ 3.03       | 88.75 $\pm$ 1.56                         | 100                     | 99        | 100        |
| DES              | 62.38 $\pm$ 1.28       | 80.15 $\pm$ 2.38                         | 99                      | 100       | 100        |
| LNG              | 79.73 $\pm$ 7.98       | 86.54 $\pm$ 3.32                         | 101                     | 99        | 100        |
| EE2              | 92.34 $\pm$ 8.25       | 97.32 $\pm$ 2.94                         | 101                     | 100       | 101        |

<sup>a</sup> In order to further evaluate the matrix effect, each of the native standard response was compared (n = 3, native standards were spiked after sample extraction) with the standards in Milli-Q water/MeOH (4:1, v/v). <sup>b</sup> Accuracy was calculated at three different concentrations for matrix spike with 10 repeat measurements, expressed as percent error of measured value to its nominal value.

**Table S4.** The concentrations of the target compounds in water samples and sediment samples.

|                               | Metabolite  | % DF <sup>a</sup> | *GM <sup>b</sup> | *AM <sup>c</sup> | *SD <sup>d</sup> | Min  | Media | Max    |
|-------------------------------|-------------|-------------------|------------------|------------------|------------------|------|-------|--------|
| <b>Wastewater<br/>(ng/mL)</b> | BP-1        | 84%               | 5.56             | 24.91            | 34.62            | N.D. | 5.85  | 131.25 |
|                               | BP-2        | 82%               | 2.74             | 7.48             | 10.46            | N.D. | 5.02  | 52.81  |
|                               | BP-3        | 95%               | 18.01            | 56.14            | 96.93            | N.D. | 15.5  | 400.53 |
|                               | BP-4        | 71%               | 2.54             | 21.86            | 44.71            | N.D. | 3.91  | 188.12 |
|                               | 2,3,4-OH-BP | 68%               | 1.88             | 14.24            | 26.59            | N.D. | 3.98  | 114.04 |
|                               | BP          | 66%               | 6.22             | 68.48            | 86.64            | N.D. | 10.65 | 298.67 |
|                               | 4-OH-BP     | 66%               | 1.67             | 7.09             | 9.79             | N.D. | 3.55  | 38.56  |
|                               | EE2         | 87%               | 7.59             | 29.82            | 69.50            | N.D. | 9.95  | 338.24 |
|                               | LNG         | 71%               | 2.06             | 6.04             | 8.51             | N.D. | 2.31  | 39.37  |
|                               | NTD         | 95%               | 6.09             | 12.23            | 18.93            | N.D. | 7.08  | 88.02  |
|                               | DES         | 74%               | 2.59             | 6.19             | 9.60             | N.D. | 4.35  | 55.48  |
|                               | GES         | 68%               | 1.51             | 4.68             | 10.83            | N.D. | 1.63  | 67.45  |
|                               | CPA         | 82%               | 4.08             | 10.81            | 20.26            | N.D. | 7.41  | 119.46 |
| <b>Sediment<br/>(ng/g dw)</b> | BP-1        | 74%               | 1.39             | 3.94             | 4.62             | N.D. | 1.61  | 17.02  |
|                               | BP-2        | 53%               | 0.76             | 3.66             | 7.36             | N.D. | 1.63  | 45.85  |
|                               | BP-3        | 92%               | 6.73             | 10.43            | 6.88             | N.D. | 9.55  | 30.21  |
|                               | BP-4        | 87%               | 1.76             | 6.51             | 10.19            | 0.02 | 4.08  | 59.91  |
|                               | 2,3,4-OH-BP | 76%               | 2.25             | 6.27             | 7.15             | N.D. | 3.61  | 33.42  |
|                               | BP          | 76%               | 3.42             | 30.35            | 69.02            | N.D. | 5.81  | 356.92 |
|                               | 4-OH-BP     | 76%               | 1.81             | 5.71             | 7.07             | N.D. | 2.39  | 29.54  |
|                               | EE2         | 97%               | 1.86             | 3.72             | 4.45             | 0.19 | 1.98  | 17.72  |
|                               | LNG         | 71%               | 0.64             | 0.99             | 1.18             | N.D. | 0.61  | 5.83   |
|                               | NTD         | 92%               | 2.01             | 3.84             | 4.26             | N.D. | 2.23  | 21.97  |
| DES                           | 58%         | 0.67              | 1.12             | 1.16             | N.D.             | 0.49 | 4.38  |        |

---

|     |     |      |      |      |      |      |       |
|-----|-----|------|------|------|------|------|-------|
| GES | 68% | 0.96 | 2.06 | 2.41 | N.D. | 0.97 | 9.41  |
| CPA | 79% | 1.26 | 2.01 | 2.06 | N.D. | 1.45 | 11.18 |

---

**Table S5.** Toxicity data of BPs and SP from the ECOTOX database for the SSD model.



| Target substance     | Species                  | Endpoint | Endpoint value(mg/L) | Target substance           | Species                | Endpoint | Endpoint value(mg/L) |
|----------------------|--------------------------|----------|----------------------|----------------------------|------------------------|----------|----------------------|
| <b>BP-1</b>          | Calanoid Copepod         | EC50     | 1.50                 | <b>BP-4</b>                | Haptophyte             | EC50     | 10                   |
|                      | Calanoid Copepod         | LC50     | 2.60                 |                            | Mysid                  | EC50     | 10                   |
|                      | Flatworm                 | LC50     | 2.80                 |                            | Sea Urchin, Echinoderm | EC50     | 10                   |
|                      | Goldfish                 | LOEC     | 0.48                 |                            | Mediterranean Mussel   | EC50     | 10                   |
|                      | Goldfish                 | NOEC     | 0.48                 |                            | Flatworm               | LC50     | 158                  |
| <b>BP-2</b>          | Zebra Danio              | EC50     | 4.70                 | Zebra Danio                | LOEC                   | 3        |                      |
|                      | Smooth Cauliflower Coral | EC50     | 0.019                | Goldfish                   | LOEC                   | 0.49     |                      |
|                      | Zebra Danio              | LC50     | 11.81                | Zebra Danio                | NOEC                   | 0.03     |                      |
|                      | Smooth Cauliflower Coral | LC50     | 28.315               | Goldfish                   | NOEC                   | 4.9      |                      |
|                      | Flatworm                 | LC50     | 8.30                 | <b>4-OH-BP</b>             | Flatworm               | LC50     | 15.8                 |
|                      | Fathead Minnow           | LOEC     | 9.70                 | <b>2,3,4-OH-BP</b>         | Flatworm               | LC50     | 34.6                 |
|                      | Zebra Danio              | LOEC     | 7.5                  | <b>BP</b>                  | Water Flea             | EC50     | 0.28                 |
|                      | Fathead Minnow           | LOEC     | 5                    | Fathead Minnow             | EC50                   | 13.7     |                      |
|                      | Goldfish                 | LOEC     | 4.78                 | Flatworm                   | LC50                   | 15.8     |                      |
|                      | Smooth Cauliflower Coral | LOEC     | 0.0246               | Bullfrog                   | LOEC                   | 1.457774 |                      |
|                      | Dinoflagellate Order     | LOEC     | 0.00246              | Fathead Minnow             | LOEC                   | 6.38     |                      |
|                      | Zebra Danio              | NOEC     | 3.693291             | Duckweed                   | LOEC                   | 1.5625   |                      |
|                      | Fathead Minnow           | NOEC     | 5                    | Fathead Minnow             | NOEC                   | 3.31     |                      |
|                      | Goldfish                 | NOEC     | 4.78                 | Japanese Medaka            | NOEC                   | 1.822218 |                      |
|                      | Smooth Cauliflower Coral | NOEC     | 24.6                 | <b>CPA</b>                 | Calanoid Copepod       | EC50     | 0.049                |
| Dinoflagellate Order | NOEC                     | 0.00246  | Scud                 | LC50                       | 2.69117                |          |                      |
| <b>BP-3</b>          | Haptophyte               | EC50     | 0.01387              | Water Flea                 | LOEC                   | 2.1      |                      |
|                      | Mysid                    | EC50     | 0.71076              | Fathead Minnow             | LOEC                   | 0.16     |                      |
|                      | Smooth Cauliflower Coral | EC50     | 0.436                | Mediterranean Feather Star | LOEC                   | 0.0003   |                      |

|                          |      |         |            |                            |      |          |
|--------------------------|------|---------|------------|----------------------------|------|----------|
| Sea Urchin, Echinoderm   | EC50 | 3.28    |            | Atlantic Dogwinkle         | LOEC | 1.25     |
| Mediterranean Mussel     | EC50 | 3.47259 |            | Netted Dog Whelk           | LOEC | 1.25     |
| Smooth Cauliflower Coral | LC50 | 2.876   |            | Great Pond Snail           | LOEC | 0.0287   |
| Thin Finger Coral        | LC50 | 0.036   |            | Water Flea                 | NOEC | 2.1      |
| Smooth Cauliflower Coral | LC50 | 12.811  |            | Calanoid Copepod           | NOEC | 0.032    |
| Boulder Star Coral       | LC50 | 0.074   |            | Water Flea                 | NOEC | 2.1      |
| Mustard Hill Coral       | LC50 | 0.34    |            | Mummichog                  | NOEC | 0.1      |
| Great Star Coral         | LC50 | 0.052   |            | Fathead Minnow             | NOEC | 0.16     |
| Coral                    | LC50 | 0.008   |            | Tilapia                    | NOEC | 100      |
| Staghorn Coral           | LC50 | 0.009   |            | Mediterranean Feather Star | NOEC | 0.003    |
| Flatworm                 | LC50 | 0.9     |            | Sea Urchin, Echinoderm     | NOEC | 0.003    |
| Haptophyte               | LOEC | 0.3     |            | Great Pond Snail           | NOEC | 0.0287   |
| Mysid                    | LOEC | 0.5     | <b>NTD</b> | Water Flea                 | EC50 | 6.41     |
| Japanese Medaka          | LOEC | 0.09    |            | Fathead Minnow             | LC50 | 0.0148   |
| Zebra Danio              | LOEC | 0.11    |            | Fathead Minnow             | LOEC | 0.00074  |
| Japanese Medaka          | LOEC | 0.62    |            | Channel Catfish            | LOEC | 0.0825   |
| Zebra Danio              | LOEC | 1.04    |            | Rainbow Trout              | LOEC | 0.1      |
| Goldfish                 | LOEC | 4.76    |            | Water Flea                 | NOEC | 500      |
| Rainbow Trout            | LOEC | 0.749   |            | Fathead Minnow             | NOEC | 0.0354   |
| Midge                    | LOEC | 0.91    |            | Channel Catfish            | NOEC | 0.0825   |
| Smooth Cauliflower Coral | LOEC | 0       |            | Rainbow Trout              | NOEC | 0.1      |
| Sea Urchin, Echinoderm   | LOEC | 3.84    | <b>LNG</b> | Clawed Frog                | LOEC | 0.000156 |
| Mediterranean Mussel     | LOEC | 0.3     |            | Clawed Frog                | NOEC | 0.000156 |
| Haptophyte               | NOEC | 0.03    | <b>EE2</b> | Zebra Danio                | EC50 | 1.964171 |
| Mysid                    | NOEC | 0.375   |            | Water Flea                 | LOEC | 1        |
| Goldfish                 | NOEC | 4.76    |            | Eastern Mosquitofish       | LOEC | 0.000106 |

|                          |      |      |
|--------------------------|------|------|
| Rainbow Trout            | NOEC | 0.08 |
| Midge                    | NOEC | 0.91 |
| Smooth Cauliflower Coral | NOEC | 0.22 |
| Sea Urchin, Echinoderm   | NOEC | 1.92 |
| Mediterranean Mussel     | NOEC | 0.03 |

|                             |      |          |
|-----------------------------|------|----------|
| Brown Trout                 | LOEC | 0.296409 |
| Yellow Catfish              | LOEC | 0.001    |
| Brown Trout                 | LOEC | 0.296409 |
| Crimson-Spotted Rainbowfish | LOEC | 0.000075 |
| Atlantic Cod                | LOEC | 0.002964 |
| Eastern Mosquitofish        | LOEC | 0.000106 |
| Zebra Danio                 | LOEC | 0.296409 |
| Brown Trout                 | LOEC | 0.01925  |
| Sea Urchin, Echinoderm      | LOEC | 0.000005 |
| Mediterranean Mussel        | LOEC | 0.0005   |

---
